## RESEARCH ARTICLE

# The impact of COVID-19 pandemic on depression and anxiety symptoms: Findings from the United Arab Emirates Healthy Future (UAEHFS) cohort study

Manal Al Blooshi<sup>1\*</sup>, Tamadher Al Ameri<sup>1</sup>, Maryam Al Marri<sup>1</sup>, Amar Ahmad<sup>1</sup>, Andrea Leinberger-Jabari<sup>1</sup>, Abdishakur Abdulle<sup>1</sup>, Manal Taimah<sup>1</sup>, Thekra Al Zaabi<sup>1</sup>, Khaloud Al Remeithi<sup>1</sup>, Ayesha Al Hosani<sup>1</sup>, Scott Sherman<sup>2</sup>, Raghieb Ali<sup>1</sup>

**1** New York University Abu Dhabi, Abu Dhabi, United Arab Emirates, **2** New York University School of Medicine, New York, New York, United States of America

\* [ma5114@nyu.edu](mailto:ma5114@nyu.edu)

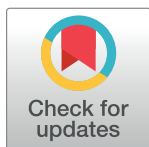

## OPEN ACCESS

**Citation:** Al Blooshi M, Al Ameri T, Al Marri M, Ahmad A, Leinberger-Jabari A, Abdulle A, et al. (2022) The impact of COVID-19 pandemic on depression and anxiety symptoms: Findings from the United Arab Emirates Healthy Future (UAEHFS) cohort study. PLoS ONE 17(11): e0277684. <https://doi.org/10.1371/journal.pone.0277684>

**Editor:** Omnia Samir El Seifi, Zagazig University Faculty of Human Medicine, EGYPT

**Received:** June 10, 2022

**Accepted:** November 1, 2022

**Published:** November 16, 2022

**Copyright:** © 2022 Al Blooshi et al. This is an open access article distributed under the terms of the [Creative Commons Attribution License](https://creativecommons.org/licenses/by/4.0/), which permits unrestricted use, distribution, and reproduction in any medium, provided the original author and source are credited.

**Data Availability Statement:** Data are from the United Arab Emirates Healthy Future (UAEHFS) study. A de-identified data set can be shared subject to the policies of the approving ethics committees and the data access policy of the UAEHFS. The New York University Abu Dhabi IRB approved informed consent form described how participant data would be shared with other researchers. The consent form states that researchers who are interested in accessing study data will contact the data access/ethics committee

## Abstract

### Background

Significant concerns about mental health were raised during the COVID-19 pandemic. We investigated the prevalence of depression and anxiety symptoms among the participants of the United Arab Emirates Healthy Future Study (UAEHFS); a national cohort study. We further explored the change in the prevalence of depression symptoms among those with comparable pre-pandemic data.

### Methods

A sample of UAEHFS participants were invited to complete a COVID-19 online questionnaire during the first wave of the pandemic. Depression and anxiety symptoms were assessed using the Patient Health Questionnaire Depression Scale (PHQ-8) and the Generalized Anxiety Disorder-7 Scale (GAD-7) respectively. Unpaired analyses were done to examine the effect of COVID-19 on depression and anxiety symptoms during the pandemic. Paired analysis was conducted to examine the change in depression symptoms.

### Results

During the pandemic, we reported a prevalence of 32.8% (95% CI: 27.0, 39.1) for depression and 26.4% (95% CI: 21.0, 32.6) for anxiety symptoms. Younger people reported higher levels of depression (40.4%) and anxiety (34.5%) symptoms. Females reported higher levels of depression (36.5%) and anxiety (32.7%) symptoms. In paired analysis, the prevalence of depression symptoms during the pandemic was 34% (95% CI: 26.5, 42.4) compared to 29.9% (95% CI: 22.7, 38.1) before the pandemic. No statistically significant difference was observed,  $p$ -value = 0.440. Adjusted multivariate logistic regression models for PHQ-8 and GAD-7 during the pandemic showed that participants, who were experiencing flu-like

to be granted access to the data. Once approved, de-identified data can be made available. Researchers who meet the criteria for access to confidential data may contact the IRB at [IRBnyuad@nyu.edu](mailto:IRBnyuad@nyu.edu) to gain access to the data.

**Funding:** The UAEHFS is funded by the New York University Abu Dhabi Research Institute. The funder had no role in study design, data collection and analysis, decision to publish, or preparation of the manuscript.

**Competing interests:** The authors have declared that no competing interests exist.

symptoms, had higher odds of reporting depression symptoms compared to those without symptoms. Additionally, age was significantly negatively associated with anxiety symptoms.

## Conclusions

Overall, we found that depression and anxiety symptoms were more prevalent among young people and females. However, we did not find a significant change in the prevalence of depression symptoms among those with comparable pre-pandemic data. Identifying vulnerable groups and understanding trajectories through longitudinal studies would help with planning for effective mental health interventions for the current and future pandemics.

## 1. Introduction

Coronavirus disease 2019 (COVID-19) is an infectious illness caused by Acute Respiratory Syndrome Coronavirus-2 (SARS-CoV-2). On March 11<sup>th</sup>, 2020, the World Health Organization declared COVID-19 as a global pandemic [1]. As of October 19, 2022, the total confirmed cases of COVID-19 worldwide had reached 630 million, of which, 1,033,458 (10.25% of the population) were reported in the United Arab Emirates (UAE) [2]. In response to the pandemic, precautionary measures were implemented worldwide to curb the spread of the virus [3, 4]. the UAE government have adopted a range of these measures including: quarantines and lockdowns, travel restrictions, school and universities closure, and suspension of mass gatherings [5].

In any pandemic, it is common for individuals to feel confused, worried, and stressed [6]. Several stressors may affect individuals directly or indirectly during crisis these include: the risk of being infected and or infecting others, feelings of helplessness, boredom and frustration, fear of being socially excluded and economic implications [6, 7]. Findings from studies of previous epidemics revealed a wide range of psychological impacts including depression and anxiety [8, 9]. Finding from studies examining the impact of COVID-19 on mental health echo those findings in both general and clinical populations [3, 10, 11]. Evidence from around the world have shown elevated levels of mental health problems including: fear [4, 10], emotional distress [12], sleep problems [13], anxiety, and depression [13, 14]. Similarly, several studies were conducted in the Gulf region and findings reported changes in levels of depression, anxiety and stress among studied populations [15–21].

In the UAE, multiple studies investigated the effect of the COVID-19 pandemic on depression and anxiety. A study conducted at the early stages of the pandemic assessed levels of anxiety and depression symptoms among adults to understand the impact of COVID-19 and its psychosocial correlates [22]. The psychological impact of the COVID-19 pandemic on adults and children was explored in another cross-sectional study [23]. Additionally, the impact of COVID-19 societal lockdown measures was assessed among UAE residents' mental health [24]. The reviewed cross-sectional studies showed a marked increase in anxiety and depression levels in some demographic sub-groups. Students, young people and females had higher levels of depression and anxiety symptoms.

Several longitudinal studies examined changes in mental health by comparing pre- and during-COVID-19 data. A study conducted in the United States (US) reported elevated rates of psychological distress among US adult in April 2020 compared to those in 2018 [25]. Moreover, a study in the United Kingdom (UK) examined mental distress found a significant increase in the mean scores between 2018–2019 and April 2020 [26]. A Dutch study focused on depression and anxiety symptoms, analyzed data collected over three time points:

November 2019, March 2020 and June 2020, found a non-significant increase in the prevalence of symptoms levels between November 2019 and March 2020. However, a significant reduction in the prevalence was observed between March 2020 and June 2020 [27]. Similarly, a Canadian study on young adults reported that depression and anxiety symptoms did not significantly change during the first wave of the pandemic [28].

To date, evidence from the UAE has been limited by use of cross-sectional design and a lack of comparable pre-COVID-19 data. In the present study we used data from a longitudinal study, namely the UAE Healthy Future Study (UAEHFS), to assess the impact of COVID-19 pandemic on depression and anxiety symptoms during the first wave of the pandemic approximately the tenth weeks after the national lockdown. We further explored the associated risk factors with depression and anxiety symptoms during the pandemic; and examined the change in the prevalence of depression symptoms among those with comparable pre-pandemic data.

## 2. Material and methods

### 2.1 Study design and participants

The UAEHFS is an ongoing, longitudinal cohort study that began in 2016 with the aim to identify the causes of chronic disease among UAE nationals; mainly diabetes, obesity and cardiovascular diseases. The participation consists of completing a detailed questionnaire on: socio-demographics and occupation, lifestyle exposures (including smoking, physical activity and diet), early life exposures, environmental exposures, psychological state, family history of illness, medical history and general health; the details of which have been published elsewhere [29].

An online COVID-19 questionnaire was designed during the initial peak of the COVID-19 pandemic and distributed on the 10th week of the national lockdown. Existing UAEHFS participants who aged between 18 and 40 at enrolment were invited to participate in this study. Invitations and reminders were sent to participants via email (Fig 1). The survey was administered via Voxco Survey Platform [30].

The study protocol was approved by the Research Ethics Committee of Abu Dhabi. Health Research and Technology Committee, reference number DOH/HQD/2020/516. Online written consent was given by participants prior to beginning of the questionnaire.

### 2.2 Procedures and measures

Data used in this study were extracted from the UAEHFS main questionnaire and the COVID-19 questionnaire. Both questionnaires were translated into Arabic and back into English for linguistic validation [29]. For the Personal Health Questionnaire Depression Scale (PHQ-8) and General Anxiety Disorder Scale (GAD-7), they were already available in Arabic and English [31]. Participants had the option to choose their preferred language (English or Arabic).

**2.2.1 Demographics.** Some demographic variables were extracted from the main UAEHFS questionnaire. These included: gender (female, male), age (18–24, 25–29, 30–34, 35–39, 40–44), education level (lower than university, university, postgraduate), and employment status (employed, Student, unemployed). The data extracted from the COVID-19 questionnaire included marital status (single, married, divorced/widowed), and whether they were working remotely during the pandemic (yes, no). The COVID-19 questionnaire asked whether they have been told by a doctor that they suffer from any chronic health conditions (yes, no) or experienced flu-like symptoms (yes, no). Participants were asked if they knew someone infected with the virus (yes, no).

**2.2.2 Pandemic worries.** To assess pandemic worries, participants were asked to rate how worried they were on five questions which were previously published [32]: “I am worried

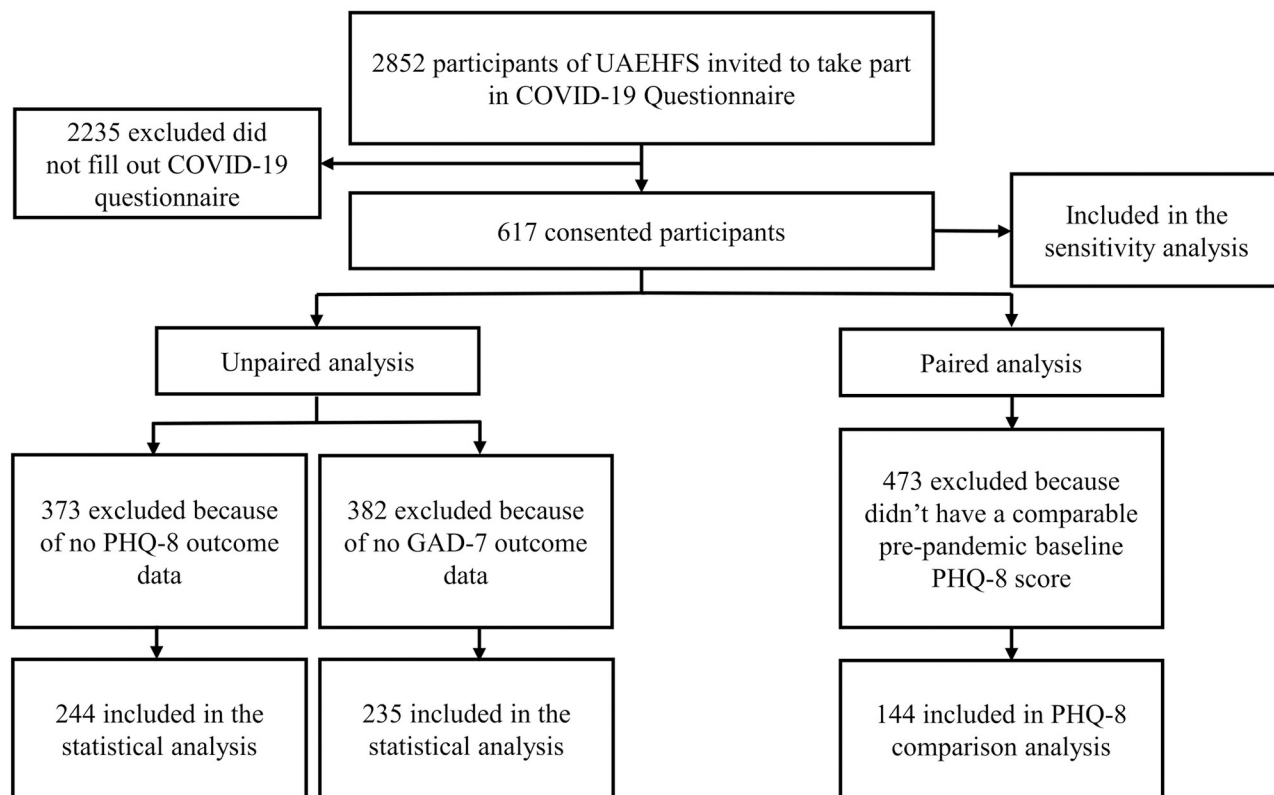

**Fig 1. Flow chart showing selection into the study.**

<https://doi.org/10.1371/journal.pone.0277684.g001>

about getting sick myself”, “I am worried that someone close to me will get sick”, “I am worried that it will take a long time before I can resume my normal daily life”, “I am worried that I or my family will be in serious financial trouble” and “I am worried that I cannot see my family and friends”. Participants responded on a 5-point Likert scale from “1: extremely worried” to “5: not worried at all”.

**2.2.3 Depression symptoms (before and during the pandemic).** To indicate the prevalence of depression symptoms, we used the Patient Health Questionnaire-8 (PHQ-8). The PHQ-8 is an instrument that consists of eight questions assessing depression symptoms over the past two weeks on administration of the assessment [33]. Scoring intervals range from 0 to 24 and are obtained by summing the responses to each question. A score from 0 to 9 represents the absence of depression symptoms. A total score of 10 and above indicate the presence of depression symptoms. For the current analysis, a cut-off value of 10 was used to dichotomize into no-depression symptoms (total PHQ-8 < 10) versus depression symptoms ( $\geq 10$ ) [33]. The estimated Cronbach alpha for the PHQ-8 showed good internal reliability before (alpha = 0.868) and during (alpha = 0.898) the pandemic.

**2.2.4 Anxiety symptoms (during the pandemic).** To estimate the prevalence of anxiety symptoms, we used the Generalized Anxiety Disorder-7 (GAD-7) [34]. The index has seven items that measure worry and anxiety symptoms during the past two weeks of administration of assessment. It is scored on a four-point Likert scale (0–3) with a total score summing the responses to each item ranging from 0–21. The higher the score, the greater anxiety severity; a score beyond 10 is considered a cut off for anxiety symptoms [35]. For the current analysis, a binary GAD-7 score was computed by dichotomizing into no-anxiety symptoms (total GAD-

7<10) versus anxiety symptoms ( $\geq 10$ ) [34]. An excellent Cronbach alpha was estimated between the items for GAD-7 ( $\alpha = 0.906$ ).

### 2.3 Statistical analysis

All applied statistical tests were two-sided and p-values less than 0.05 were considered as statistically significant. No adjustments for multiple comparisons were made. Statistical analysis was conducted using R version 4.0.2 [36]. The statistical methods were documented in a pre-specified statistical analysis plan to minimize bias in the results. In both questionnaires, each question had two additional answer options: “Prefer not to answer” and “I don’t know”. These options were categorized as “unknown”.

In the paired analysis, categorical data was presented in frequencies and percentages. Missing values in the variables were categorized as “unknown”. Chi-square ( $\chi^2$ ) tests were performed to explore the associations between participant demographics, general health, pandemic worries with depression and anxiety symptoms, respectively. Correspondingly, p-values were computed using 2000 Monte Carlo simulation. For each outcome, such as the dichotomized PHQ-8 and GAD-7, a multivariate logistic regression model was performed respectively. The predictors were age, gender, marital status, education level, employment status, working remotely, presence of health condition, experiencing flu-like symptoms and knowing someone infected with COVID-19. Odds ratios (ORs) and confidence intervals (95% CI) were computed, and corresponding z-values and P-values were reported. The estimated area under the curve (AUC) corresponding 95% CI for each multivariate logistic regression model was calculated to assess the model performance. In the paired analysis, exact McNemar test was performed to compare the PHQ-8 pre and during COVID-19 pandemic. A sensitivity analysis was performed with 200 multiple imputations. Rubin’s Rules were used to pool the ORs of the McNemar test.

## 3. Results

Out of 617 consented participants, 244 (39.5%) and 235 (38.1%), who completed the questionnaire for PHQ-8 and GAD-7 scores, respectively, were included in the unpaired analysis (Fig 1). The median age of the study participant was 28 years (Interquartile range (IQ): 22–35).

Table 1 summarizes the frequency (percentages) of each categorical variable presented by the dichotomized PHQ-8 and GAD-7 categories during the pandemic. Participants were more likely to be females, aged 19 to 24 years, single, hold a university degree and employed. Around 25% indicated that they were working remotely due to the pandemic. Almost 36% reported having a health condition, and nearly 30% were experiencing flu-like symptoms. The majority of participants reported knowing someone infected with COVID-19 (Table 1).

### 3.1 Depression and anxiety symptoms during the pandemic

A strong Spearman rank correlation was found between the total PHQ-8 score and GAD-7-score 0.757 (95%CI: 0.692, 0.810). The prevalence of depression during the pandemic was 32.8% (95% CI: 27.0, 39.1). Depression was more prevalent among participants who were single (37.5%), among students (43.6%), those who were reporting to workplaces (37.5%), had a health condition (35.6%) and those who had experienced flu-like symptoms (45.2%), p value <0.05 (Table 1). Depression was higher in females (36.5%) and participants between the ages of 18 and 24 years (40.4%), but differences were not significant.

The prevalence of anxiety during the pandemic was 26.4% (95% CI: 21.0, 32.6). Overall, female participants (32.7%) were more anxious than males (13.2%). Students showed significant differences in anxiety compared to employed participants; 40% and 23.7% respectively.

Table 1. Demographic characteristics by the dichotomized PHQ-8 score (PHQ-8 &gt; 10) and dichotomized anxiety score (GAD-7 &gt; 10) during the pandemic.

| Variable                               | Category              | Depression               |                        |         | Anxiety                  |                        |         |
|----------------------------------------|-----------------------|--------------------------|------------------------|---------|--------------------------|------------------------|---------|
|                                        |                       | dichotomized PHQ-8 score |                        |         | dichotomized GAD-7 score |                        |         |
|                                        |                       | (n = 244)                |                        |         | (n = 235)                |                        |         |
|                                        |                       | n(%)                     | Yes (n)%<br>PHQ-8 > 10 | P-value | n(%)                     | Yes (n)%<br>GAD-7 > 10 | P-value |
| Age                                    | 18–24                 | 114 (47)                 | 46 (40.4)              | 0.137   | 110 (47)                 | 38 (34.5)              | 0.085   |
|                                        | 25–29                 | 38 (16)                  | 12 (31.6)              |         | 37 (16)                  | 8 (21.6)               |         |
|                                        | 30–34                 | 46 (19)                  | 10 (21.7)              |         | 43 (18)                  | 9 (20.9)               |         |
|                                        | 35–39                 | 40 (16)                  | 10 (25)                |         | 39 (17)                  | 7 (17.9)               |         |
|                                        | 40–44                 | 6 (3)                    | 2 (33.3)               |         | 6 (3)                    | 0 (0)                  |         |
| Gender                                 | Female                | 167 (68)                 | 61 (36.5)              | 0.078   | 159 (68)                 | 52 (32.7)              | 0.002*  |
|                                        | Male                  | 77 (32)                  | 19 (24.7)              |         | 76 (32)                  | 10 (13.2)              |         |
| Marital Status                         | Single                | 164 (67)                 | 62 (37.8)              | 0.039*  | 161 (69)                 | 48 (29.8)              | 0.017*  |
|                                        | Divorced/Widowed      | 9 (4)                    | 3 (33.3)               |         | 8 (3)                    | 4 (50)                 |         |
|                                        | Married               | 71 (29)                  | 15 (21.1)              |         | 66 (28)                  | 10 (15.2)              |         |
| Education                              | University            | 107 (44)                 | 37 (34.6)              | 0.699   | 102 (43)                 | 26 (25.5)              | 0.634   |
|                                        | Lower than University | 95 (39)                  | 27 (28.4)              |         | 92 (39)                  | 23 (25)                |         |
|                                        | Postgraduate          | 11 (5)                   | 4 (36.4)               |         | 10 (4)                   | 4 (40)                 |         |
|                                        | Unknown**             | 31 (13)                  | 12 (38.7)              |         | 31 (13)                  | 9 (29)                 |         |
| Employment Status***                   | Employed              | 102 (42)                 | 28 (27.5)              | 0.085   | 97 (41)                  | 23 (23.7)              | 0.007*  |
|                                        | Student               | 78 (32)                  | 34 (43.6)              |         | 75 (32)                  | 30 (40)                |         |
|                                        | Unemployed            | 42 (17)                  | 14 (33.3)              |         | 41 (17)                  | 6 (14.6)               |         |
|                                        | unknown**             | 22 (9)                   | 4 (18.2)               |         | 22 (9)                   | 3 (13.6)               |         |
| Working Remotely                       | Yes                   | 62 (25)                  | 11 (17.7)              | 0.0154* | 61 (26)                  | 11 (18)                | 0.078   |
|                                        | No                    | 48 (20)                  | 18 (37.5)              |         | 44 (19)                  | 14 (31.8)              |         |
|                                        | Students & unemployed | 120 (49)                 | 48 (40)                |         | 116 (49)                 | 36 (31%)               |         |
|                                        | Unknown**             | 14 (6)                   | 3 (21)                 |         | 14 (6)                   | 1 (7%)                 |         |
| Health Condition                       | No                    | 157 (64)                 | 49 (31.2)              | <0.001* | 150 (64)                 | 43 (28.7)              | <0.001* |
|                                        | Yes                   | 87 (36)                  | 31 (35.6)              |         | 85 (36)                  | 19 (22.4)              |         |
| Experiencing flu-like symptom          | No                    | 171 (70)                 | 47 (27.5)              | <0.001* | 166 (71)                 | 34 (20.5)              | <0.001* |
|                                        | Yes                   | 73 (30)                  | 33 (45.2)              |         | 69 (29)                  | 28 (40.6)              |         |
| Knowing someone infected with COVID-19 | No                    | 89 (37)                  | 33 (37.1)              | 0.387   | 85 (36)                  | 24 (28.2)              | 0.736   |
|                                        | Unknown**             | 12 (5)                   | 3 (25)                 |         | 12 (5)                   | 4 (33.3)               |         |
|                                        | Yes                   | 143 (59)                 | 44 (30.8)              |         | 138 (59)                 | 34 (24.6)              |         |

\* Significant at  $p < 0.05$ 

\*\*\* Preferred not answer" or "I don't know" values were categorized as "unknown"

\*\*\* measured pre-pandemic

<https://doi.org/10.1371/journal.pone.0277684.t001>

Participants who had a health condition and were experiencing flu-like symptoms were more anxious (40.6%). However, anxiety was higher among participants with higher levels of education but differences were not significant. (Table 1).

### 3.2 Pandemic worries

Table 2 shows that participants were mostly worried about “someone close to them will get sick” and “that it will take a long time before they can resume a normal daily life”. For depression, participants who were extremely worried that “someone close to them will get sick” were significantly more likely to report depression (48.8%) compared to those who were not



Table 2. Pandemic worries by the dichotomized PHQ-8 score (PHQ-8 &gt; 10) and dichotomized anxiety score (GAD-7 &gt; 10) during the pandemic.

| Variable                                                                            | Category           | Depression               |                        |              | Anxiety                  |                        |                   |
|-------------------------------------------------------------------------------------|--------------------|--------------------------|------------------------|--------------|--------------------------|------------------------|-------------------|
|                                                                                     |                    | dichotomized PHQ-8 score |                        |              | dichotomized GAD-7 score |                        |                   |
|                                                                                     |                    | (n = 244)                |                        |              | (n = 235)                |                        |                   |
|                                                                                     |                    | n(%)                     | Yes (n)%<br>PHQ-8 > 10 | P-value      | n(%)                     | Yes (n)%<br>GAD-7 > 10 | P-value           |
| I am worried about getting sick myself                                              | Extremely worried  | 21 (9)                   | 10 (47.6)              | 0.349        | 19 (8)                   | 9 (47.4)               | 0.19              |
|                                                                                     | Very worried       | 29 (12)                  | 11 (37.9)              |              | 28 (12)                  | 8 (28.6)               |                   |
|                                                                                     | Somewhat worried   | 62 (25)                  | 17 (27.4)              |              | 60 (26)                  | 13 (21.7)              |                   |
|                                                                                     | Little worried     | 71 (29)                  | 20 (28.2)              |              | 69 (29)                  | 15 (21.7)              |                   |
|                                                                                     | Not worried at all | 55 (23)                  | 20 (36.4)              |              | 54 (23)                  | 16 (29.6)              |                   |
|                                                                                     | Unknown**          | 6 (2)                    | 2 (33.3)               |              | 5 (2)                    | 1 (20)                 |                   |
| I am worried that someone close to me will get sick                                 | Extremely worried  | 60 (25)                  | 25 (41.7)              | <b>0.025</b> | 59 (25)                  | 27 (45.8)              | <b>&lt;0.001*</b> |
|                                                                                     | Very worried       | 62 (25)                  | 21 (33.9)              |              | 59 (25)                  | 13 (22)                |                   |
|                                                                                     | Somewhat worried   | 52 (21)                  | 21 (40.4)              |              | 50 (21)                  | 13 (26)                |                   |
|                                                                                     | Little worried     | 40 (16)                  | 7 (17.5)               |              | 39 (17)                  | 5 (12.8)               |                   |
|                                                                                     | Not worried at all | 26 (11)                  | 4 (15.4)               |              | 25 (11)                  | 3 (12)                 |                   |
|                                                                                     | Unknown**          | 4 (2)                    | 2 (50)                 |              | 3 (1)                    | 1 (33.3)               |                   |
| I am worried that it will take a long time before I can resume my normal daily life | Extremely worried  | 41 (17)                  | 20 (48.8)              | <b>0.017</b> | 39 (17)                  | 18 (46.2)              | <b>0.022</b>      |
|                                                                                     | Very worried       | 49 (20)                  | 19 (38.8)              |              | 47 (20)                  | 14 (29.8)              |                   |
|                                                                                     | Somewhat worried   | 64 (26)                  | 21 (32.8)              |              | 63 (27)                  | 13 (20.6)              |                   |
|                                                                                     | Little worried     | 47 (19)                  | 10 (21.3)              |              | 46 (20)                  | 9 (19.6)               |                   |
|                                                                                     | Not worried at all | 34 (14)                  | 6 (17.6)               |              | 32 (14)                  | 5 (15.6)               |                   |
|                                                                                     | Unknown**          | 9 (4)                    | 4 (44.4)               |              | 8 (3)                    | 3 (37.5)               |                   |
| I am worried that I or my family will be in serious financial trouble               | Extremely worried  | 39 (16)                  | 18 (46.2)              | 0.3          | 38 (16)                  | 17 (44.7)              | <b>0.051</b>      |
|                                                                                     | Very worried       | 26 (11)                  | 8 (30.8)               |              | 26 (11)                  | 7 (26.9)               |                   |
|                                                                                     | Somewhat worried   | 30 (12)                  | 9 (30)                 |              | 27 (11)                  | 4 (14.8)               |                   |
|                                                                                     | Little worried     | 35 (14)                  | 12 (34.3)              |              | 33 (14)                  | 9 (27.3)               |                   |
|                                                                                     | Not worried at all | 98 (40)                  | 26 (26.5)              |              | 96 (41)                  | 21 (21.9)              |                   |
|                                                                                     | Unknown**          | 16 (7)                   | 7 (43.8)               |              | 15 (6)                   | 4 (26.7)               |                   |

(Continued)

Table 2. (Continued)

| Variable                                             | Category           | Depression               |                      |         | Anxiety                  |                      |              |
|------------------------------------------------------|--------------------|--------------------------|----------------------|---------|--------------------------|----------------------|--------------|
|                                                      |                    | dichotomized PHQ-8 score |                      |         | dichotomized GAD-7 score |                      |              |
|                                                      |                    | (n=244)                  |                      |         | (n = 235)                |                      |              |
|                                                      |                    | n(%)                     | Yes (n)%<br>PHQ-8>10 | P-value | n(%)                     | Yes (n)%<br>GAD-7>10 | P-value      |
| I am worried that I cannot see my family and friends | Extremely worried  | 36 (15)                  | 17 (47.2)            | 0.352   | 35 (15)                  | 15 (42.9)            | <b>0.045</b> |
|                                                      | Very worried       | 47 (19)                  | 14 (29.8)            |         | 45 (19)                  | 10 (22.2)            |              |
|                                                      | Somewhat worried   | 45 (18)                  | 15 (33.3)            |         | 44 (19)                  | 15 (34.1)            |              |
|                                                      | Little worried     | 47 (19)                  | 15 (31.9)            |         | 47 (20)                  | 7 (14.9)             |              |
|                                                      | Not worried at all | 59 (24)                  | 16 (27.1)            |         | 55 (23)                  | 13 (23.6)            |              |
|                                                      | Unknown**          | 10 (4)                   | 3 (30)               |         | 9 (4)                    | 2 (22.2)             |              |

\* Significant at  $p < 0.05$

\*\*"Preferred not answer" or "I don't know" values were categorized as "unknown"

<https://doi.org/10.1371/journal.pone.0277684.t002>

worried at all (17.6%). Similarly, participants who were extremely worried that it will take a long time before they can resume a normal daily life were significantly more likely to report depression (41.7%) compared to those who were not worried at all (15.4%). Significantly higher percentages of anxiety were reported among participants who were extremely worried that: someone close to them will get sick (45.8%), it will take a long time before they can resume a normal daily life (46.2%), they will be in serious financial trouble (44.7%), they will not be able to see their family or friends (42.9%).

Table 3 shows the results of multivariate logistic regression models with the dichotomized PHQ-8 score GAD-7 score as outcomes. In both models, the effects of age, gender, marital status, education level, employment status, remote work, presence of health condition, experiencing flu-like symptoms and knowing someone infected with COVID-19 were assessed. Estimated ORs and corresponding 95% CIs as well as Wald's z values (and p-values) are illustrated in Table 3. In model A, participants who were experiencing flu-like symptoms had 2.12 times higher odds of reporting depression compared to those without symptoms. In model B, age was statistically significant negatively associated with anxiety OR of 0.9 (95%CI: 0.82, 0.99), P value = 0.03. Participants experiencing flu-like symptoms had 2.2 times higher odds of reporting anxiety than those without symptoms. The estimated area under the curve (AUC) corresponding 95% CI for model A is 0.696 (95% CI: 0.6275–0.7583) (500 stratified bootstrap replicates) and for model B 0.763 (95% CI: 0.6961–0.8288) (500 stratified bootstrap replicates), which shows a good models' performance.

### 3.3 Depression symptoms before and during the pandemic

A comparison analysis was performed for 144 participants with a comparable pre-pandemic baseline PHQ-8 data (Fig 1). The prevalence of depression before and during pandemic using the dichotomized PHQ-8 was 29.9% (95% CI: 22.7, 38.1) and 34% (95% CI: 0.265, 0.424) respectively. No statistically significant difference was observed, OR = 1.33 (95% CI: 0.69, 2.61), exact McNemar test's p-value = 0.441. The result of the sensitivity analysis using 200 multiple imputations gave an OR = 1.77 (95% CI: 1.23, 2.52). S1 Fig shows the estimated ORs with corresponding 95% CIs from the omitted dataset and 200 imputed datasets.



Table 3. Multivariate logistic regression models with dichotomized PHQ-8 and GAD-7 as outcomes.

| Variable                           | Model A (PHQ-8)          |              | Model B (GAD-7)          |                |
|------------------------------------|--------------------------|--------------|--------------------------|----------------|
|                                    | dichotomized PHQ-8 score |              | dichotomized GAD-7 score |                |
|                                    | OR (95% CI)              | z value (p)  | OR (95% CI)              | z value (p)    |
| Age                                | 0.998 (0.93, 1.07)       | -0.05 (0.96) | 0.9 (0.82, 0.99)         | -2.22 (0.03) * |
| gender = Male                      | 1.104 (0.53, 2.28)       | 0.27 (0.79)  | 0.439 (0.18, 1.06)       | -1.82 (0.07)   |
| Marital Status = Divorced/Widowed  | 0.635 (0.13, 3.19)       | -0.55 (0.58) | 4.82 (0.79, 29.44)       | 1.7 (0.09)     |
| Marital Status = Married           | 0.552 (0.24, 1.25)       | -1.43 (0.15) | 0.76 (0.29, 2)           | -0.56 (0.58)   |
| Education = Lower than University  | 0.682 (0.34, 1.36)       | -1.09 (0.28) | 0.833 (0.38, 1.81)       | -0.46 (0.64)   |
| Education = Postgraduate           | 1.486 (0.36, 6.08)       | 0.55 (0.58)  | 3.01 (0.66, 13.79)       | 1.42 (0.16)    |
| Education = unknown                | 0.884 (0.36, 2.16)       | -0.27 (0.79) | 0.769 (0.27, 2.18)       | -0.49 (0.62)   |
| Employment Status = student        | 1.879 (0.33, 10.63)      | 0.71 (0.48)  | 3.423 (0.49, 24.09)      | 1.24 (0.22)    |
| Employment Status = unemployed     | 1.365 (0.26, 7.07)       | 0.37 (0.71)  | 1.501 (0.23, 9.88)       | 0.42 (0.67)    |
| Employment Status = unknown        | 0.721 (0.15, 3.39)       | -0.41 (0.68) | 0.782 (0.14, 4.34)       | -0.28 (0.78)   |
| Heath condition = Yes              | 1.242 (0.66, 2.33)       | 0.67 (0.5)   | 0.831 (0.4, 1.75)        | -0.49 (0.63)   |
| Flu-like symptoms = Yes            | 2.12 (1.13, 3.99)        | 2.33 (0.02)* | 2.2 (1.1, 4.4)           | 2.23 (0.03)*   |
| Knowing someone infected = unknown | 0.549 (0.13, 2.41)       | -0.79 (0.43) | 2.65 (0.51, 13.65)       | 1.17 (0.24)    |
| Knowing someone infected = Yes     | 0.633 (0.34, 1.17)       | -1.45 (0.15) | 0.657 (0.33, 1.32)       | -1.18 (0.24)   |
| Remote work = No                   | 2.431 (0.92, 6.39)       | 1.8 (0.07)   | 1.302 (0.44, 3.83)       | 0.48 (0.63)    |
| Remote work = unknown              | 1.531 (0.32, 7.35)       | 0.53 (0.59)  | 0.182 (0.03, 1.11)       | -1.85 (0.06)   |

<https://doi.org/10.1371/journal.pone.0277684.t003>

## 4. Discussion

Using longitudinal data from the UAEHFS, this study is one of the few studies that explored the impact of COVID-19 pandemic on depression and anxiety symptoms among the youthful population of the UAE (the median age in the UAE is 32.6 years) [37]. COVID-19 related data was collected during the first wave of the pandemic. While, pre-COVID-19 data was collected approximately two years before the pandemic from the same study sample. We explored the prevalence of depression and anxiety symptoms during COVID-19 pandemic and assessed the change in depression symptoms pre- and during-COVID-19 pandemic.

The prevalence of depression and anxiety symptoms have previously been explored among the population of the UAE during the COVID-19 pandemic. In our study, the prevalence of depression and anxiety during the pandemic were (32.8%) and (26.4%) respectively. Both prevalence were lower than those was reported by [22] of 58.4% and 55.7% for depression and anxiety, respectively. The different prevalence of depression and anxiety could be explained by differences in the timing of studying the associations during the lockdown at the time of the first COVID-19 peak. Additionally, the sample composition was considerably different to our sample. Thomas and his colleagues used a larger sample size, which constituted of 65 different nationalities [22].

We found that during the COVID-19 pandemic, depression and anxiety symptoms were more prevalent among females, younger population age (19–25) and students, as well as participants who reported to work. Furthermore, participants who knew someone with COVID-19 or had flu like symptoms were more likely to report depression symptoms. Marital status showed an interesting correlation to the outcomes of interest. For instance, being married was protective against depression and anxiety. However, being divorced or widowed was protective against depression, but a risk factor to develop anxiety symptoms. In addition, a strong correlation was found between PHQ-8 score and GAD-7-score that reflects the comorbidity of these two conditions.

The higher prevalence of depression and anxiety symptoms during the COVID-19 pandemic among females is consistent with findings from other studies in the UAE [22–24], and globally [13, 38–40]. This could be explained by a social role expectation of women that they are seen as main caregivers, which can be, stress inducing. Moreover, during COVID-19 pandemic, most caring mothers had extra effort exerted at home watching their children remotely schooling on top of their jobs and family responsibilities [23, 24].

Though not statistically significant, the prevalence of depression and anxiety symptoms varied among different age groups. Aligned with findings from other studies in the UAE, and globally, youngest age group (18–24) years had the highest prevalence of depression and anxiety symptoms compared to other age groups. This finding is particularly significant for the UAE, which has a relatively youthful population. The increase in depression and anxiety symptoms in the younger age group can be explained by social factors. We found that the prevalence of depression and anxiety were higher among students and majority of this age group are (18–24) students. Study exploring this further in the UAE, reported that students above the age of 20 had significantly more anxiety and depression in comparison to students below 20 years of age [41]. Students' lifestyle is known to be stressful and under the pandemic circumstances, students had to adopt a new online distant-learning, which may have created uncertainty regarding their education and future [42]. Additionally, distance learning may have exacerbated pre-existing stress levels and altered their motivation to study, increased level of pressure to learn independently and reduced student's ability to use typical coping strategies and daily routines [43]. We found that there was a significant difference across marital status categories in relation to the outcomes; with being single scoring the highest. The results are contradicting, what was found in Kuwait and Saudi Arabia that marital status did not have any influence on anxiety levels of the respondents [16, 17]. However, in our study we found being divorced/ widowed was protective against depression, but increased the risk of anxiety by almost four times.

In the univariate analysis, working remotely was associated with lower anxiety and significant lower depression symptoms. This could be due to the reduction of stress-related to being exposed to coronavirus infection. Removing self from environments that are perceived to be risky can be protective against depression and anxiety symptoms. On the other hand, in the multivariate logistic regression analyses, reporting to work increased the risk of depression and anxiety. Having a flu-like symptom was associated with a significant increase in the odds of having depression and anxiety symptoms, as the perceived risk of being COVID positive, can elevate psychological symptoms due to an intense emotional response. Moreover, having a flu-like symptoms means that the individual is at risk of being quarantined, which induces negative emotions such as fear and loneliness [44]. Furthermore, pandemic worries such as being worried that someone close gets sick was significantly associated with elevated anxiety symptoms.

In the Middle East, which the UAE is part of, the communities are known to be collective in nature. One of the features of such communities is putting higher values to the groups' wants and needs upon the individual's [45]. Shekrladze and his colleagues reported that collectivism could induce stress via transferable emotions from family and friend to the individual, leading to a collective emotional response to a problem or event [46]. Psychologically, the susceptibility to depression and anxiety plays a major role in coping with the pandemic worries. For instance, individual patterns of thinking, feelings, behaviors and emotions determines personal perceptions on the pandemic and its consequences and threats [47, 48]. Moreover, people with high neuroticism tend to experience more intense negative emotions, such as, fear, anger, and irritability during stressful events [49, 50]. With the long duration of the pandemic and chronic poor coping mechanisms combined with intense emotional reactivity; individuals with high neuroticism tend to be at higher risk of developing depression and anxiety [48].

A secondary aim of the study was to explore the change in depression symptoms relative to pre-pandemic measure. We were able to compare the depression symptoms for 144 participants using data collected before and during the pandemic. For this group, the prevalence of depression symptoms before the pandemic was 29.9% and it increased to 34% during the pandemic but was not statistically significant. This finding is consistent with those reported in the Canadian longitudinal study in regards to the change in the prevalence of depression symptoms [28]. Similar result was reported in the Dutch longitudinal study, where prevalence of depression increased non significantly during March 2020, but decreased to significantly in June 2020 [27]. On the other hand, significant changes in mental health were reported in the UK population [26, 51]. A study investigating the trajectories of anxiety and depression symptoms in the UK reported that highest levels of symptoms occurred in the early stages of the lockdown but declined across the 20 weeks following the start of the lockdown [51]. The inconsistencies in findings across countries could be due to different COVID-19 restrictive measures, timing of undertaking the research, sample representativeness and use of different assessment instruments.

This study has its strengths and limitations. The main strength of this study lies in the use of longitudinal data from the first national cohort prospective study in the UAE from the same participants. Moreover, the use of standardized instruments of depression and anxiety is another strength of this study. On the other hand, we did not include any COVID-19 related instruments such as the fear of COVID-19 Scale [52]. Including such instruments would have enriched our study. A significant limitation of our study is the sample size, which is relatively small. This may have reduced the statistical power, particularly in the comparison analysis. Therefore, our results were interpreted in an exploratory manner. Additionally, the use of convenience sampling may introduce some selection biases in the present study. For instance, our study includes more females (68%) than males (32%). However, this percentage is lower than reported in UAE-based similar studies 75% in [24] and 85.6% in [22]. Missing values were omitted in the primary statistical analysis, which decreased the sample size and may have led to a false negative result in the main finding. The sensitivity analysis showed an increase in the value of the OR with a statistically significant result. Due to sample representativeness, findings from this study may not be generalizable to other subgroups in the UAE and beyond including elderly and children.

## 5. Conclusions

The current study provides a general picture of the impact of COVID-19 pandemic on mental health among the youthful population of the UAEHFS during the first wave of the pandemic. We found that the prevalence of depression and anxiety symptoms were highest among the youngest age groups and females. The prevalence of depression symptoms increased compared to before the pandemic for those with pre-pandemic measure. Our study adds to the growing literature on the impact of COVID-19 pandemic on mental health in the UAE. To get a fuller picture, further work is needed using longitudinal studies with larger representative sample and subsequent follow ups. This would help in exploring trajectories of mental health problems over time and identifying vulnerable groups at a wider level.

## Supporting information

**S1 Fig. Result of the sensitivity analysis using 200 multiple imputations.**  
(PDF)

## Acknowledgments

The authors acknowledge and thank the UAE Healthy Future study participants who took a part in this research.

## Author Contributions

**Conceptualization:** Manal Al Blooshi, Tamadher Al Ameri, Maryam Al Marri, Andrea Leinberger-Jabari, Abdishakur Abdulle, Raghieb Ali.

**Data curation:** Manal Al Blooshi, Amar Ahmad, Andrea Leinberger-Jabari.

**Formal analysis:** Manal Al Blooshi, Tamadher Al Ameri, Maryam Al Marri, Amar Ahmad.

**Funding acquisition:** Scott Sherman, Raghieb Ali.

**Investigation:** Manal Al Blooshi, Raghieb Ali.

**Methodology:** Manal Al Blooshi, Tamadher Al Ameri, Maryam Al Marri, Amar Ahmad, Andrea Leinberger-Jabari, Abdishakur Abdulle, Manal Taimah, Thekra Al Zaabi, Khaloud Al Remeithi, Ayesha Al Hosani, Raghieb Ali.

**Project administration:** Manal Al Blooshi, Amar Ahmad, Andrea Leinberger-Jabari, Abdishakur Abdulle, Raghieb Ali.

**Software:** Amar Ahmad, Andrea Leinberger-Jabari.

**Supervision:** Raghieb Ali.

**Writing – original draft:** Manal Al Blooshi, Tamadher Al Ameri, Maryam Al Marri.

**Writing – review & editing:** Manal Al Blooshi, Tamadher Al Ameri, Maryam Al Marri, Amar Ahmad, Andrea Leinberger-Jabari, Abdishakur Abdulle, Manal Taimah, Thekra Al Zaabi, Khaloud Al Remeithi, Ayesha Al Hosani, Scott Sherman, Raghieb Ali.

## References

1. World Health Organization. WHO Timeline—COVID-19. 2020.
2. Worldometer. Covid-19 coronavirus pandemic 2022. <https://www.worldometers.info/coronavirus/>.
3. Chung GK, Strong C, Chan YH, Chung RY, Chen JS, Lin YH, et al. Psychological Distress and Protective Behaviors During the COVID-19 Pandemic Among Different Populations: Hong Kong General Population, Taiwan Healthcare Workers, and Taiwan Outpatients. *Front Med (Lausanne)*. 2022; 9:800962.
4. Pakpour AH, Liu CH, Hou WL, Chen YP, Li YP, Kuo YJ, et al. Comparing Fear of COVID-19 and Preventive COVID-19 Infection Behaviors Between Iranian and Taiwanese Older People: Early Reaction May Be a Key. *Front Public Health*. 2021; 9:740333. <https://doi.org/10.3389/fpubh.2021.740333> PMID: 34631652
5. United Arab Emirates Government portal. Handling the COVID-19 outbreak 2021. <https://u.ae/en/information-and-services/justice-safety-and-the-law/handling-the-covid-19-outbreak>.
6. Brooks SK, Webster RK, Smith LE, Woodland L, Wessely S, Greenberg N, et al. The psychological impact of quarantine and how to reduce it: rapid review of the evidence. *The Lancet*. 2020; 395(10227):912–20.
7. Siddaway AP. Multidisciplinary research priorities for the COVID-19 pandemic. *Lancet Psychiatry*. 2020; 7(7):e43. [https://doi.org/10.1016/S2215-0366\(20\)30220-0](https://doi.org/10.1016/S2215-0366(20)30220-0) PMID: 32563318
8. Liu X, Kakade M, Fuller CJ, Fan B, Fang Y, Kong J, et al. Depression after exposure to stressful events: lessons learned from the severe acute respiratory syndrome epidemic. *Compr Psychiatry*. 2012; 53(1):15–23. <https://doi.org/10.1016/j.comppsy.2011.02.003> PMID: 21489421
9. Reynolds DL, Garay JR, Deamond SL, Moran MK, Gold W, Styra R. Understanding, compliance and psychological impact of the SARS quarantine experience. *Epidemiol Infect*. 2008; 136(7):997–1007. <https://doi.org/10.1017/S0950268807009156> PMID: 17662167

10. Alimoradi Z, Ohayon MM, Griffiths MD, Lin CY, Pakpour AH. Fear of COVID-19 and its association with mental health-related factors: systematic review and meta-analysis. *BJPsych Open*. 2022; 8(2):e73. <https://doi.org/10.1192/bjo.2022.26> PMID: 35307051
11. Xiong J, Lipsitz O, Nasri F, Lui LMW, Gill H, Phan L, et al. Impact of COVID-19 pandemic on mental health in the general population: A systematic review. *J Affect Disord*. 2020; 277:55–64. <https://doi.org/10.1016/j.jad.2020.08.001> PMID: 32799105
12. Shanahan L, Steinhoff A, Bechtiger L, Murray AL, Nivette A, Hepp U, et al. Emotional distress in young adults during the COVID-19 pandemic: evidence of risk and resilience from a longitudinal cohort study. *Psychological medicine*. 2020:1–10. <https://doi.org/10.1017/S003329172000241X> PMID: 32571438
13. Gualano MR, Lo Moro G, Voglino G, Bert F, Siliquini R. Effects of Covid-19 Lockdown on Mental Health and Sleep Disturbances in Italy. *International journal of environmental research and public health*. 2020; 17(13):4779. <https://doi.org/10.3390/ijerph17134779> PMID: 32630821
14. Hajure M, Tariku M, Mohammedhussein M, Dule A. Depression, Anxiety and Associated Factors Among Chronic Medical Patients Amid COVID-19 Pandemic in Mettu Karl Referral Hospital, Mettu, Ethiopia, 2020. *Neuropsychiatr Dis Treat*. 2020; 16:2511–8. <https://doi.org/10.2147/NDT.S281995> PMID: 33149592
15. Al Omari O, Al Sabei S, Al Rawajfah O, Abu Sharour L, Aljohani K, Alomari K, et al. Prevalence and Predictors of Depression, Anxiety, and Stress among Youth at the Time of COVID-19: An Online Cross-Sectional Multicountry Study. *Depress Res Treat*. 2020; 2020:8887727. <https://doi.org/10.1155/2020/8887727> PMID: 33062331
16. Alasousi L, al Hammouri S, al Al-abdulahadi S. Anxiety and media exposure during COVID-19 outbreak in Kuwait. *medRxiv*. 2020.
17. Alkhamees AA, Alrashed SA, Alzunaydi AA, Almohimeed AS, Aljohani MS. The psychological impact of COVID-19 pandemic on the general population of Saudi Arabia. *Comprehensive Psychiatry*. 2020; 102:152192. <https://doi.org/10.1016/j.comppsy.2020.152192> PMID: 32688022
18. Als Salman A, Jahrami H, Mubarak H, Aljabal M, Abdulnabi M, Yusuf A, et al. The Psychological Impact of COVID-19 Pandemic on the population of Bahrain. *Acta Biomed*. 2020; 91(4):e2020131. <https://doi.org/10.23750/abm.v91i4.10336> PMID: 33525217
19. Reagu S, Wadoo O, Latoo J, Nelson D, Ouanes S, Masoodi N, et al. Psychological impact of the COVID-19 pandemic within institutional quarantine and isolation centres and its sociodemographic correlates in Qatar: a cross-sectional study. *BMJ Open*. 2021; 11(1):e045794. <https://doi.org/10.1136/bmjopen-2020-045794> PMID: 33518530
20. Albagmi FM, AlNujaidi HY, Al Shawan DS. Anxiety Levels Amid the COVID-19 Lockdown in Saudi Arabia. *Int J Gen Med*. 2021; 14:2161–70. <https://doi.org/10.2147/IJGM.S312465> PMID: 34103971
21. Alsharji KE. Anxiety and depression during the COVID-19 pandemic in Kuwait: the importance of physical activity. *Middle East Current Psychiatry*, Ain Shams University. 2020; 27(1):60.
22. Thomas J, Barbato M, Verlinden M, Gaspar C, Moussa M, Ghorayeb J, et al. Psychosocial Correlates of Depression and Anxiety in the United Arab Emirates During the COVID-19 Pandemic. *Front Psychiatry*. 2020; 11:564172. <https://doi.org/10.3389/fpsy.2020.564172> PMID: 33240122
23. Saddik B, Hussein A, Albanna A, Elbarazi I, Al-Shujairi A, Temsah M-H, et al. The psychological impact of the COVID-19 pandemic on adults and children in the United Arab Emirates: a nationwide cross-sectional study. *BMC Psychiatry*. 2021; 21(1):224. <https://doi.org/10.1186/s12888-021-03213-2> PMID: 33941119
24. Cheikh Ismail L, Mohamad MN, Bataineh MaF, Ajab A, Al-Marzouqi AM, Jarrar AH, et al. Impact of the Coronavirus Pandemic (COVID-19) Lockdown on Mental Health and Well-Being in the United Arab Emirates. *Frontiers in Psychiatry*. 2021; 12(265). <https://doi.org/10.3389/fpsy.2021.633230> PMID: 33796033
25. McGinty EE, Presskreischer R, Han H, Barry CL. Psychological Distress and Loneliness Reported by US Adults in 2018 and April 2020. *JAMA*. 2020; 324(1):93–4. <https://doi.org/10.1001/jama.2020.9740> PMID: 32492088
26. Pierce M, Hope H, Ford T, Hatch S, Hotopf M, John A, et al. Mental health before and during the COVID-19 pandemic: a longitudinal probability sample survey of the UK population. *Lancet Psychiatry*. 2020; 7(10):883–92. [https://doi.org/10.1016/S2215-0366\(20\)30308-4](https://doi.org/10.1016/S2215-0366(20)30308-4) PMID: 32707037
27. Van Der Velden PG, Hyland P, Contino C, Von Gaudecker H-M, Muffels R, Das M. Anxiety and depression symptoms, the recovery from symptoms, and loneliness before and after the COVID-19 outbreak among the general population: Findings from a Dutch population-based longitudinal study. *PLOS ONE*. 2021; 16(1):e0245057. <https://doi.org/10.1371/journal.pone.0245057> PMID: 33411843
28. Watkins-Martin K, Orri M, Pennestri M-H, Castellanos-Ryan N, Larose S, Gouin J-P, et al. Depression and anxiety symptoms in young adults before and during the COVID-19 pandemic: evidence from a Canadian population-based cohort. *Annals of General Psychiatry*. 2021; 20(1).



29. Abdulle A, Alnaeemi A, Aljunaibi A, Al Ali A, Al Saedi K, Al Zaabi E, et al. The UAE healthy future study: a pilot for a prospective cohort study of 20,000 United Arab Emirates nationals. *BMC Public Health*. 2018; 18(1):101. <https://doi.org/10.1186/s12889-017-5012-2> PMID: 29304844
30. Voxco. Montreal 2021. <https://www.voxco.com/>.
31. Spitzer RL. Patient health questionnaire: PHQ. [New York]: [New York State Psychiatric Institute], [1999] ©1999; 1999.
32. Mc Intyre K, Lanting P, Deelen P, Wiersma HH, Vonk JM, Ori APS, et al. Lifelines COVID-19 cohort: investigating COVID-19 infection and its health and societal impacts in a Dutch population-based cohort. *BMJ Open*. 2021; 11(3):e044474. <https://doi.org/10.1136/bmjopen-2020-044474> PMID: 33737436
33. Kroenke K, Strine TW, Spitzer RL, Williams JB, Berry JT, Mokdad AH. The PHQ-8 as a measure of current depression in the general population. *J Affect Disord*. 2009; 114(1–3):163–73. <https://doi.org/10.1016/j.jad.2008.06.026> PMID: 18752852
34. Spitzer RL, Kroenke K, Williams JB, Löwe B. A brief measure for assessing generalized anxiety disorder: the GAD-7. *Arch Intern Med*. 2006; 166(10):1092–7. <https://doi.org/10.1001/archinte.166.10.1092> PMID: 16717171
35. Johnson SU, Ulvenes PG, Øktedalen T, Hoffart A. Psychometric Properties of the General Anxiety Disorder 7-Item (GAD-7) Scale in a Heterogeneous Psychiatric Sample. *Frontiers in psychology*. 2019; 10:1713-. <https://doi.org/10.3389/fpsyg.2019.01713> PMID: 31447721
36. R Core Team. R: A language and environment for statistical computing. R Foundation for Statistical Computing, Vienna, Austria. 2018.
37. Worldometer. United Arab Emirates Population 2022 [<https://www.worldometers.info/world-population/united-arab-emirates-population/>].
38. Dai L-L, Wang X, Jiang T-C, Li P-F, Wang Y, Wu S-J, et al. Anxiety and depressive symptoms among COVID-19 patients in Jiangnan Fangcang Shelter Hospital in Wuhan, China. *PloS one*. 2020; 15(8): e0238416–e. <https://doi.org/10.1371/journal.pone.0238416> PMID: 32857826
39. Ettman CK, Abdalla SM, Cohen GH, Sampson L, Vivier PM, Galea S. Prevalence of Depression Symptoms in US Adults Before and During the COVID-19 Pandemic. *JAMA Network Open*. 2020; 3(9): e2019686–e. <https://doi.org/10.1001/jamanetworkopen.2020.19686> PMID: 32876685
40. Parlapani E, Holeva V, Voitsidis P, Blekas I, Gliatas I, Porfyri GN, et al. Psychological and Behavioral Responses to the COVID-19 Pandemic in Greece. *Frontiers in psychiatry*. 2020; 11:821-. <https://doi.org/10.3389/fpsyg.2020.00821> PMID: 32973575
41. Abuhmaidan Y, Al-Majali S. The Impact of the Coronavirus Pandemic on Mental Health among Al Ain University Students in Light of some Demographic Variables. *Psychiatr Danub*. 2020; 32(3–4):482–90. <https://doi.org/10.24869/psyd.2020.482> PMID: 33370757
42. Drissi N, Alhmoudi A, Al Nuaimi H, Alkhyeli M, Alsalam S, Ouhbi S. Investigating the Impact of COVID-19 Lockdown on the Psychological Health of University Students and Their Attitudes Toward Mobile Mental Health Solutions: Two-Part Questionnaire Study. *JMIR Form Res*. 2020; 4(10):e19876. <https://doi.org/10.2196/19876> PMID: 32969340
43. Grubic N, Badovinac S, Johri AM. Student mental health in the midst of the COVID-19 pandemic: A call for further research and immediate solutions. *International Journal of Social Psychiatry*. 2020; 66(5):517–8. <https://doi.org/10.1177/0020764020925108> PMID: 32364039
44. Şahan E, Ünal SM, Kırpınar İ. Can we predict who will be more anxious and depressed in the COVID-19 ward? *J Psychosom Res*. 2021; 140:110302. <https://doi.org/10.1016/j.jpsychores.2020.110302> PMID: 33264750
45. Shakibai S. An examination of collectivist cultural orientation among middle eastern college students of different gender, generation status, and academic class standing: University of Maryland, College Park; 2005.
46. Shekrladze I, Javakhishvili N, Chkhaidze N. Culture Related Factors May Shape Coping During Pandemics. *Frontiers in psychology*. 2021; 12:634078-. <https://doi.org/10.3389/fpsyg.2021.634078> PMID: 34093315
47. Kroencke L, Geukes K, Utesch T, Kuper N, Back MD. Neuroticism and emotional risk during the COVID-19 pandemic. *Journal of Research in Personality*. 2020; 89:104038. <https://doi.org/10.1016/j.jrp.2020.104038> PMID: 33071370
48. Shokrkon A, Nicoladis E. How personality traits of neuroticism and extroversion predict the effects of the COVID-19 on the mental health of Canadians. *PLoS One*. 2021; 16(5):e0251097. <https://doi.org/10.1371/journal.pone.0251097> PMID: 34010299
49. Pereira-Morales AJ, Adan A, Forero DA. Perceived stress as a mediator of the relationship between neuroticism and depression and anxiety symptoms. *Current Psychology*. 2019; 38(1):66–74.



50. Pradhan M, Chettri A, Maheshwari S. Fear of death in the shadow of COVID-19: The mediating role of perceived stress in the relationship between neuroticism and death anxiety. *Death Studies*. 2022; 46(5):1106–10. <https://doi.org/10.1080/07481187.2020.1833384> PMID: 33064632
51. Fancourt D, Steptoe A, Bu F. Trajectories of anxiety and depressive symptoms during enforced isolation due to COVID-19 in England: a longitudinal observational study. *Lancet Psychiatry*. 2021; 8(2):141–9. [https://doi.org/10.1016/S2215-0366\(20\)30482-X](https://doi.org/10.1016/S2215-0366(20)30482-X) PMID: 33308420
52. Ahorsu DK, Lin C-Y, Imani V, Saffari M, Griffiths MD, Pakpour AH. The fear of COVID-19 scale: development and initial validation. *International journal of mental health and addiction*. 2020:1–9. <https://doi.org/10.1007/s11469-020-00270-8> PMID: 32226353
